# Supplementary material for: Transcriptional Analysis of T Cells Resident in Human Skin
Source: PLOS journal article supplement (doi:10.1371/journal.pone.0148351), 2016-01-29
Supplement: S1 (10.1371/journal.pone.0148351.s001) [file journal.pone.0148351.s001]

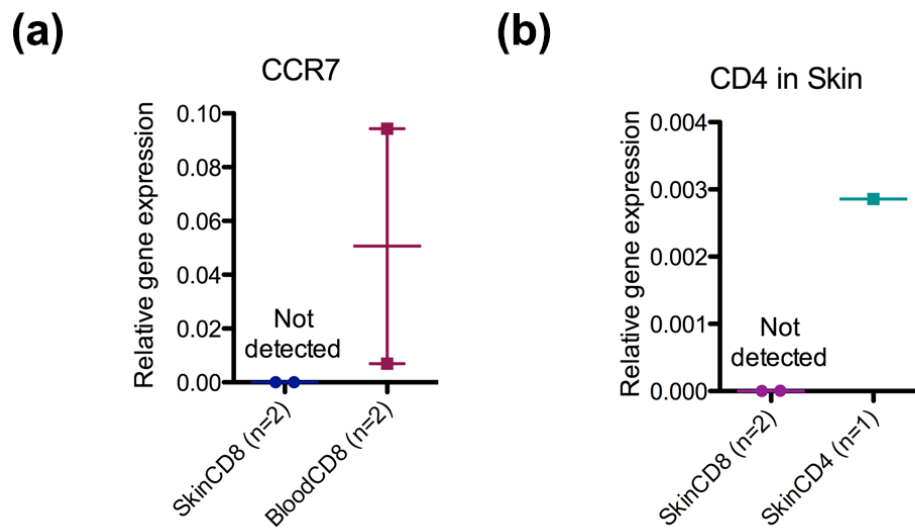

**S1 Fig. Validation of microarray results using quantitative real-time PCR.**

(a) PCR was performed to examine CCR7 expression in sorted skin- and blood-derived CD8<sup>+</sup> T cells. (b) Expression of CD4 in skin-derived CD8<sup>+</sup> and CD4<sup>+</sup> T cells as determined by PCR.
