# Supplementary material for: Transcriptional Analysis of T Cells Resident in Human Skin
Source: PLOS journal article supplement (doi:10.1371/journal.pone.0148351), 2016-01-29
Supplement: S7 (10.1371/journal.pone.0148351.s007) [file journal.pone.0148351.s007]

**S5 Table. Gene ontology (GO) analysis of differentially expressed genes upregulated in skin T cells compared to blood T cells.**

| GO-Slim Biological Process | # of genes involved | Expected representation | Fold Enrichment | Adjusted P-value |
|----------------------------|---------------------|-------------------------|-----------------|------------------|
| protein folding            | 7                   | 0.56                    | > 5             | 0.000358         |
| response to stress         | 12                  | 2.37                    | > 5             | 0.000914         |
| apoptotic process          | 9                   | 1.97                    | 4.56            | 0.0351           |
| cell death                 | 9                   | 2.03                    | 4.44            | 0.0424           |
| death                      | 9                   | 2.04                    | 4.41            | 0.0446           |
| immune system process      | 15                  | 5.01                    | 2.99            | 0.0255           |

Data obtained from PANTHER version 10.0 Overrepresentation Test (release 20150430) using PANTHER GO-Slim Biological Process annotation data set. P-values are adjusted for multiple testing with the Bonferroni method.
